# Supplementary material for: TNF-Like Ligand 1 Aberrance Aggravates Nonalcoholic Steatohepatitis via M1 Macrophage Polarization
Source: Oxid Med Cell Longev. 2021 Dec 31;2021:3877617. doi: 10.1155/2021/3877617 (PMC8741351; doi:10.1155/2021/3877617)
Supplement: Supplementary Materials — Supplemental Table 1: oligonucleotide sequences used for quantitative real-time PCR analysis. Supplemental Figure 1: myeloid-specific TL1A overexpression induces macrophages polarization to M1 phenotype in mice of MCD model. [file 3877617.f1.zip]

Archive with 2 entries (2 files):
- 3877617.f1.docx
- Figure-S1.ppt
